# Supplementary material
Source: Springer Nature journal article supplement (https://www.springermedizin.de/resource/supplementary/12905_2011_274_MOESM4_ESM.pdf/9518428)

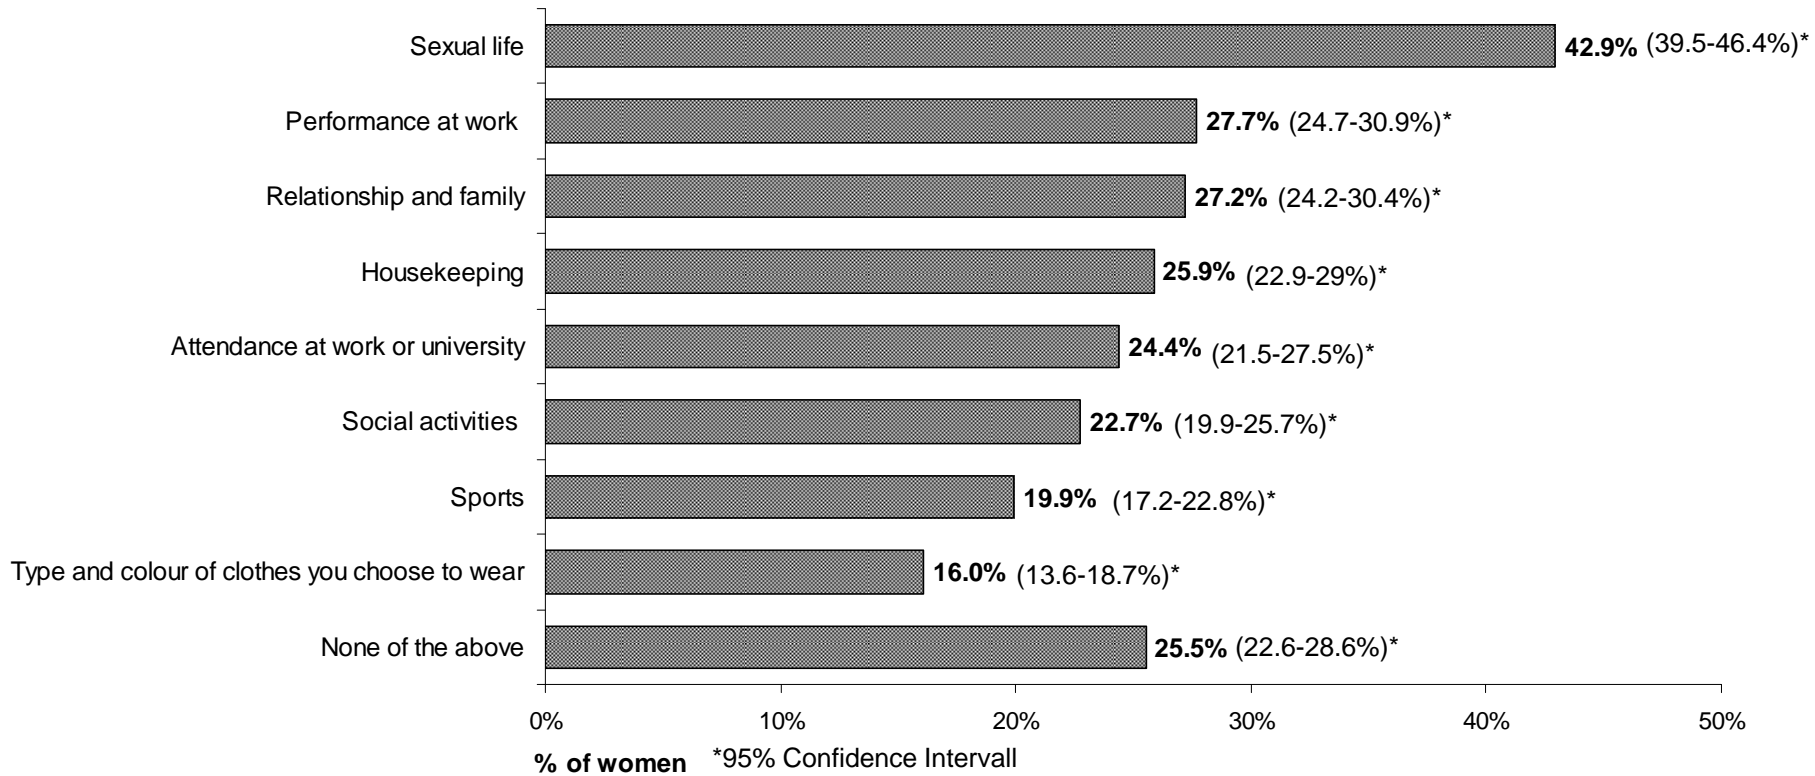

Supplement: MOESM4 [file 9518428]
